# Supplementary material
Source: PubMed Central journal article supplement (PMC3122942)
Supplement: supp_blood-2010-07-295873_Document1.pdf [file supp_blood-2010-07-295873_Document1.pdf]

## Mice

*Nfil3*<sup>-/-</sup> mice were generated as previously described.<sup>1</sup> *Nfil3*<sup>-/-</sup> mice backcrossed with C57BL/6 for at least 10 generations were used for all experiments. The act-mOVA/K<sup>b</sup><sup>-/-</sup> mice were a generous gift from Dr. Stephen Schoenberger (La Jolla Institute for Allergy & Immunology).<sup>2</sup> All mice were bred and maintained under specific pathogen-free conditions. All experimental mouse protocols were adhered to Institutional Animal Care and Use Committee guidelines and were approved by the IACUC of University of Iowa.

## Real-time RT-PCR

RNA was isolated from purified cells or stimulated cells as indicated and cDNA was synthesized using the SuperScript<sup>®</sup> First-Strand Synthesis System (Invitrogen). Quantification of mRNA expression was performed using SYBR<sup>®</sup> GREEN PCR Master Mix on the 7900HT Fast Real-Time PCR System (Applied Biosystems). The expression levels of each gene were normalized to the expression of *Hprt1*. The following primers were used: *Nfil3*, 5'-GAACTCTGCCTTAGCTGAGGT-3' and 5'-ATTCCCGTTTTCTCCGACACG-3'; *Hprt1*, 5'-GTTGGATACAGGCCAGACTTTGTTG-3' and 5'-GATTCAACTTGCGCTCATCTTAGGC-3'; *Batf3*, 5'-CAGAGCCCCAAGGACGATG-3' and 5'-GCACAAAGTTCATAGGACACAGC-3'; *Irf8*, 5'-CGGGGCTGATCTGGGAAAAT-3' and 5'-CACAGCGTAACCTCGTCTTC-3'; *Id2*, 5'-ATGAAAGCCTTCAGTCCGGTG-3' and 5'-AGCAGACTCATCGGGTCGT-3'; *Irf4*, 5'-TCCGACAGTGTTGATCGAC-3' and 5'-CCTCACGATTGTAGTCCTGCTT-3'.

## Flow cytometry

Cell suspensions from spleen, thymus, blood and BM culture were stained for using following antibodies: CD11c (N418, HL3), CD4 (RM4-5), CD8a (53-6.7), DEC-205 (DEC-205), CD24 (M1/69), PDCA-1 (927) SIRP- $\alpha$  (p84), CD45RA (14.8), Thy1.2 (30-H12), c-kit (2B8), Sca-1 (D7), Flt3 (A2F10), CD127 (A7R34), CD115 (AFS98), CD3 (145-2C11), B220 (RA3-6B2), CD19 (eBio1D3), CD11b (M1/70), Gr-1 (RB6-8C5), Ter119 (Ter-119), pan-NK (DX5), IL-12 (C15.6), if necessary, streptavidin (APC-Cy7). These antibodies were purchased from BD Biosciences, eBiosciences, and Biolegend. For IL-12 detection, stimulated DCs were stained for CD11c and CD45RA, fixed, permeabilized, and then stained with anti-IL-12 antibody. MHC class I tetramers (K<sup>b</sup>) specific for OVA<sub>257-264</sub> were prepared using published protocols.<sup>3,4</sup> OVA<sub>257-264</sub> peptide (SIINFEKL) was custom ordered from Bio-synthesis. The tetramer staining protocol was previous described.<sup>5</sup> Cells were analyzed with LSR II (BD Biosciences), and data were interpreted with CellQuest (BD Biosciences) or FlowJo (Tree Star).

## Isolation of dendritic cells

Spleen cDCs were isolated as described previously.<sup>6</sup> Briefly, minced spleens were treated with collagenase D (Roche) for 30 min at 37°C and red blood cells (RBCs) were lysed. To deplete T cells, B cells, and pDCs, cells were incubated with anti-Thy1.2 and anti-B220 microbeads. Unbound cells were further incubated with anti-CD11c microbeads to purify cDCs.

## In vivo DC induction

Mice were subcutaneously injected with  $5 \times 10^6$  B16 melanoma cells expressing FL as described previously.<sup>7</sup> Eight days after 8 injection, splenocytes were examined for DC population by flow cytometry.

### **Bone marrow culture**

RBCs-depleted BM cells were cultured at  $1.5 \times 10^6$  cells/ml in the presence of 50 ng/ml mouse FL (Peprotech) for 9 days. To identify each DC subset cells were stained for CD11c, CD45RA, CD24, and SIRP- $\alpha$ .

### **Viral transduction**

Retroviral constructs for BATF3 and NFIL3 were generated by cloning BATF3 cDNA or NFIL3 cDNA into pMIG. Whole BM cells were cultured in the presence of 50 ng/ml FL for 2 days, then spin-infected with viruses produced by transient transfection of viral constructs into 293T cells. After infection, cells were grown in the presence of 50 ng/ml FL for another 7 days before being subjected to flow cytometry. Infected cells were identified as GFP<sup>+</sup> cells.

### **In vivo cross-priming assay**

Irradiated splenocytes ( $5 \times 10^6$  cells) from act-mOVA/K<sup>b-/-</sup> mice were injected into *Nfil3*<sup>+/-</sup> or *Nfil3*<sup>-/-</sup> mice intravenously. Five days after injection, the magnitude of the OVA<sub>257-264</sub>-specific CD8<sup>+</sup> T-cell response in PBL and spleen was determined by MHC class I-peptide tetramer staining.<sup>5</sup>

### **REFERENCES**

1. Kashiwada M, Levy DM, McKeag L, et al. IL-4-induced transcription factor NFIL3/E4BP4 controls IgE class switching. *Proc Natl Acad Sci U S A*. 2010;107(2):821-826.
2. Janssen EM, Droin NM, Lemmens EE, et al. CD4<sup>+</sup> T-cell help controls CD8<sup>+</sup> T-cell memory via TRAIL-mediated activation-induced cell death. *Nature*. 2005;434(7029):88-93.
3. Altman JD, Moss PA, Goulder PJ, et al. Phenotypic analysis of antigen-specific T lymphocytes. *Science*. 1996;274(5284):94-96.
4. Busch DH, Pilip IM, Vijn S, Pamer EG. Coordinate regulation of complex T-cell populations responding to bacterial infection. *Immunity*. 1998;8(3):353-362.
5. Badovinac VP, Porter BB, Harty JT. Programmed contraction of CD8(+) T cells after infection. *Nat Immunol*. 2002;3(7):619-626.
6. Hildner K, Edelson BT, Purtha WE, et al. Batf3 deficiency reveals a critical role for CD8alpha<sup>+</sup> dendritic cells in cytotoxic T-cell immunity. *Science*. 2008;322(5904):1097-1100.
7. Pham NL, Badovinac VP, Harty JT. A default pathway of memory CD8 T-cell differentiation after dendritic cell immunization is deflected by encounter with inflammatory cytokines during antigen-driven proliferation. *J Immunol*. 2009;183(4):2337-2348.
